# Supplementary material for: Motor skill learning and reward consumption differentially affect VTA activation
Source: PubMed Central journal article supplement (PMC5766527; doi:10.1038/s41598-017-18716-w), 2018-01-12
Supplement: 41598_2017_18716_MOESM1_ESM.pdf [file 41598_2017_18716_MOESM1_ESM.pdf]

**Title:**

Motor skill learning and reward consumption differentially affect VTA activation

**Authors:**

Susan Leemburg<sup>1</sup>

Tara Canonica<sup>1,3</sup>

Andreas Luft<sup>1,2\*</sup>

<sup>1</sup> Division of Vascular Neurology and Rehabilitation, Department of Neurology, University Hospital Zurich, Zurich, Switzerland

<sup>2</sup> cereneo Center for Neurology and Rehabilitation, Vitznau, Switzerland

<sup>3</sup> College of Biomedical and Life Sciences, School of Psychology, Cardiff University, Cardiff, United Kingdom

\*corresponding author

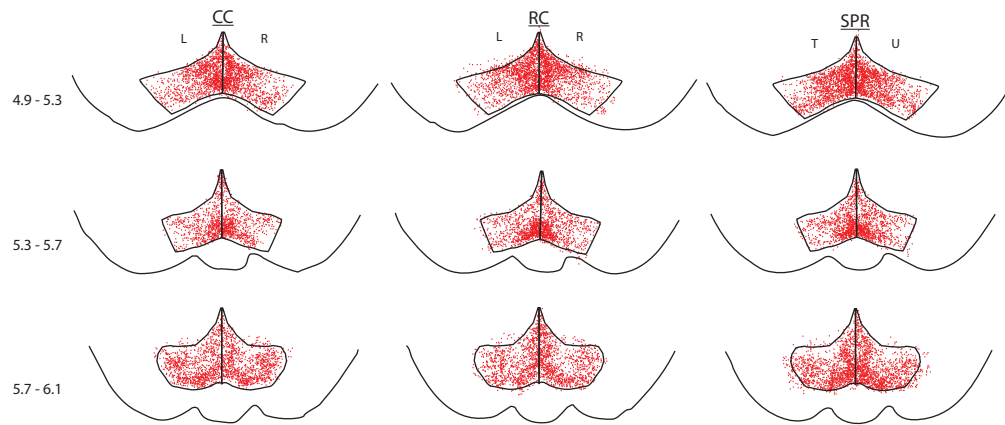

**Fig. S1** Superposition of  $c\text{-fos}^+TH^-$  neurons in VTA during successful acquisition (N=8 animals per group, 2 sections per animal). SPR= skilled reaching, RC= reward control, CC= cage control. T= trained, U= untrained, L= left, R= right hemisphere. Numbers indicate position caudal of bregma.

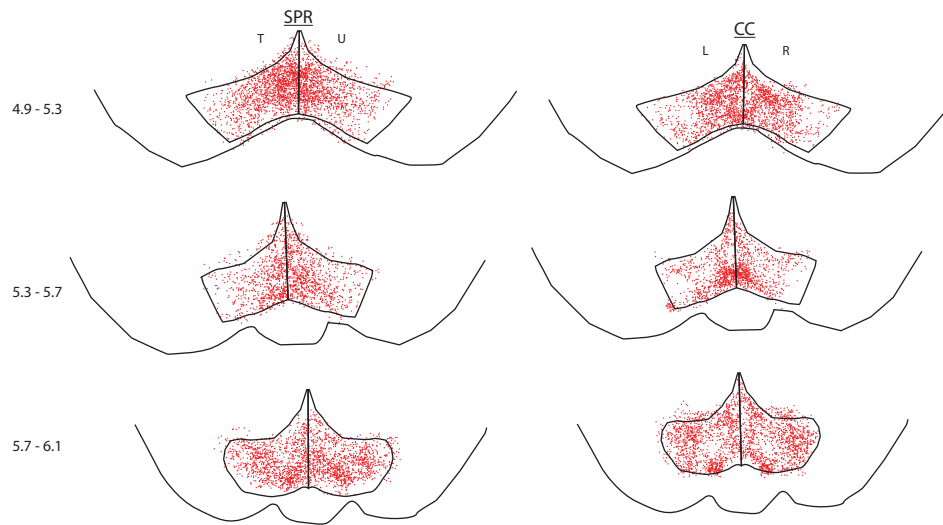

**Fig. S2** Superposition of c-fos<sup>+</sup>TH<sup>+</sup> neurons in VTA during unsuccessful acquisition (N=6 animals per group, 2 sections per animal). SPR= skilled reaching, RC= reward control, CC= cage control. T= trained, U= untrained, L= left, R= right hemisphere. Numbers indicate position caudal of bregma.
